# Supplementary material for: Synthesis and application of a new class of D–π–A type charge transfer probe containing imidazole – naphthalene units for detection of F− and CO2
Source: Royal Society of Chemistry journal article supplement (doi:10.1039/c6ra26439e), 2017-01-01
Supplement: c6ra26439e1.pdf [file c6ra26439e1.pdf]

## SUPPLEMENTARY INFORMATION

### **Synthesis and application of a new class of *D-π-A* type charge transfer probe containing imidazole – naphthalene units for detection of F<sup>-</sup> and CO<sub>2</sub>**

Ramesh C. Gupta, Rashid Ali, Syed S. Razi, Priyanka Srivastava, Sushil K. Dwivedi and

Arvind Misra\*

Department of Chemistry, Institute of Science, Banaras Hindu University, Varanasi – 221 005 UP  
INDIA

[arvindmisra2003@yahoo.com](mailto:arvindmisra2003@yahoo.com); [amisra@bhu.ac.in](mailto:amisra@bhu.ac.in)

#### **Contents**

**Figure S1:** <sup>1</sup>H NMR spectrum of **1** in DMSO-*d*<sub>6</sub>.

**Figure S2:** FT-IR spectrum of **1**.

**Figure S3:** <sup>1</sup>H NMR spectrum of **3** in DMSO-*d*<sub>6</sub>.

**Figure S4:** FT-IR spectrum of **3**.

**Figure S5:** <sup>13</sup>C NMR spectrum of **3** in DMSO-*d*<sub>6</sub>.

**Figure S6:** ESI-MS spectrum of **3**.

**Figure S7:** <sup>1</sup>H NMR spectrum of **2** in DMSO-*d*<sub>6</sub>.

**Figure S8:** FT-IR spectrum of **2**.

**Figure S9:** <sup>1</sup>H NMR spectrum of **4** in DMSO-*d*<sub>6</sub>.

**Figure S10:** FT-IR spectrum of **4**.

**Figure S11:** <sup>13</sup>C NMR spectrum of **4** in DMSO-*d*<sub>6</sub>.

**Figure S12:** ESI-MS spectrum of **4**.

**Table-S13:** Photophysical properties of **3**

**Table-S14:** Photophysical properties of **4**

**Figure S15:** (a) Absorption and (b) Normalised Emission spectra of probe **3** in different solvents.

**Figure S16:** (a) Absorption and (b) Normalized Emission spectra of probe **4** in different solvents.

**Figure S17:** (a) Absorption (10 μM) and (b) emission spectra of **3** (10 μM) upon interaction with CN<sup>-</sup>, AcO<sup>-</sup> and F<sup>-</sup> anions (150.0 equiv) in DMSO.

**Figure S18:** Fluorescence intensity change of **3**+F<sup>-</sup> system (10 μM, λ<sub>ex</sub> = 340 nm) upon bubbling with different concentration of CO<sub>2</sub> gas.

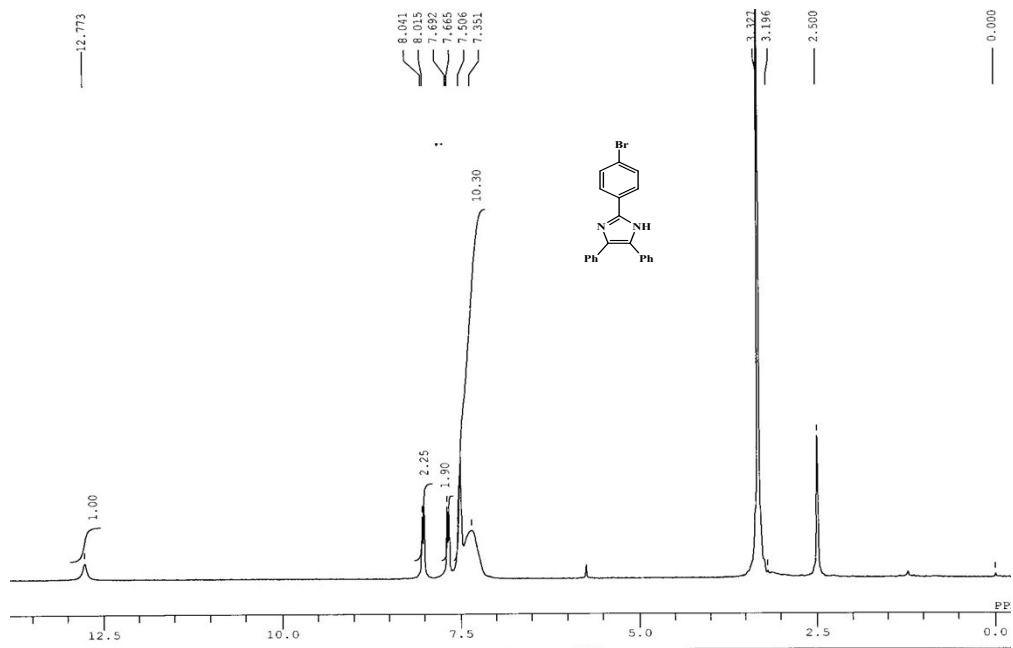

**Figure S1:** <sup>1</sup>H NMR spectrum of 1 in DMSO-*d*<sub>6</sub>.

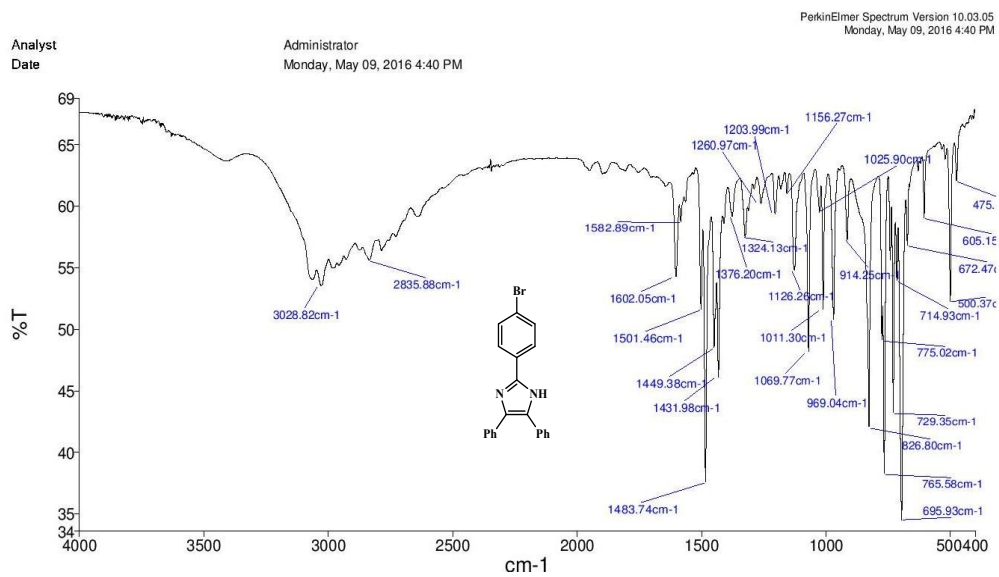

**Figure S2:** FT-IR spectrum of 1.

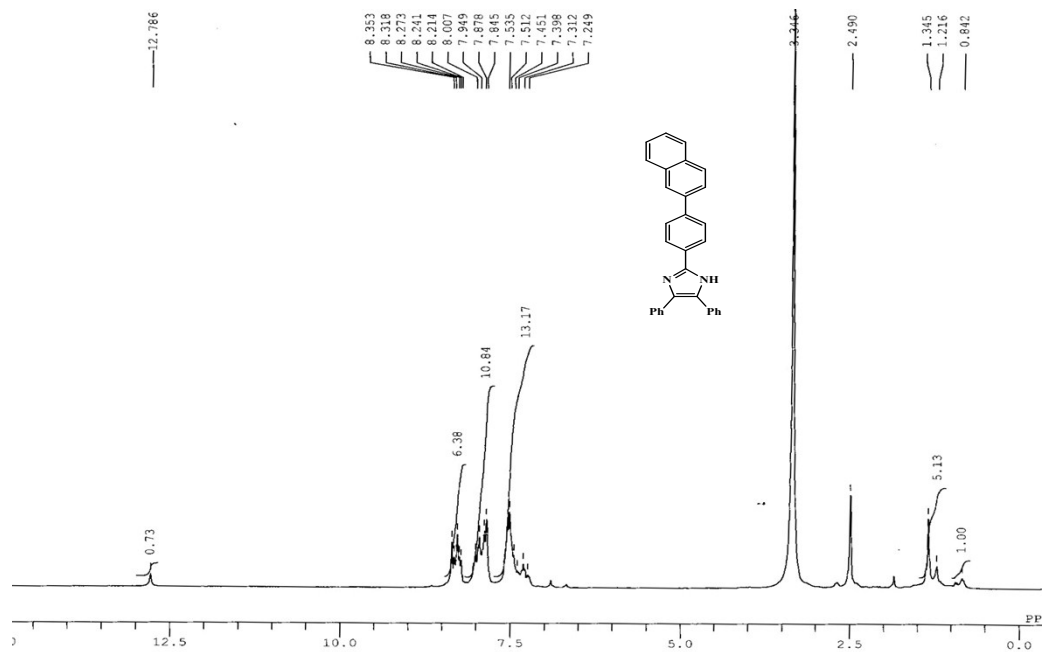

**Figure S3:** <sup>1</sup>H NMR spectrum of 3 in DMSO-*d*<sub>6</sub>.

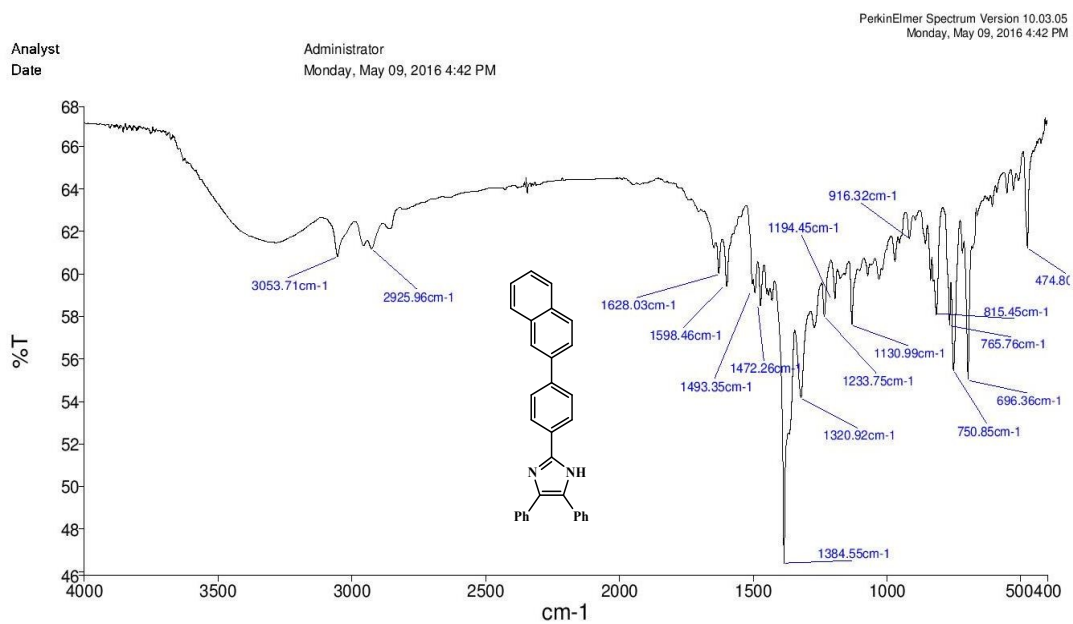

**Figure S4:** FT-IR spectrum of 3.

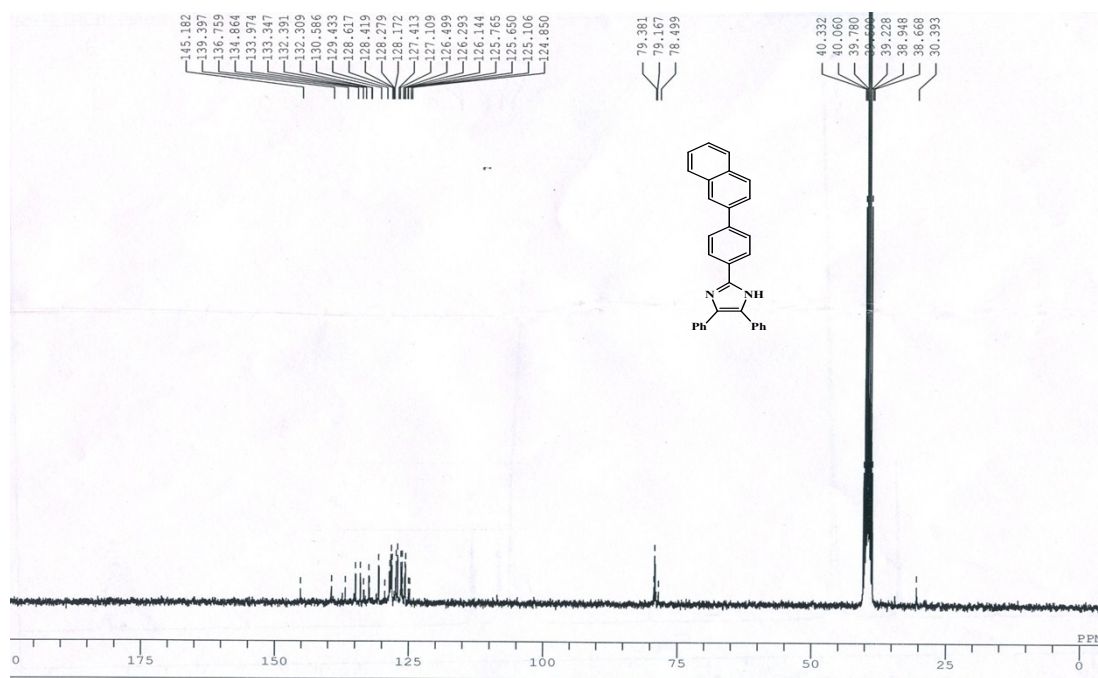

**Figure S5:**  $^{13}\text{C}$  NMR spectrum of **3** in  $\text{DMSO-}d_6$ .

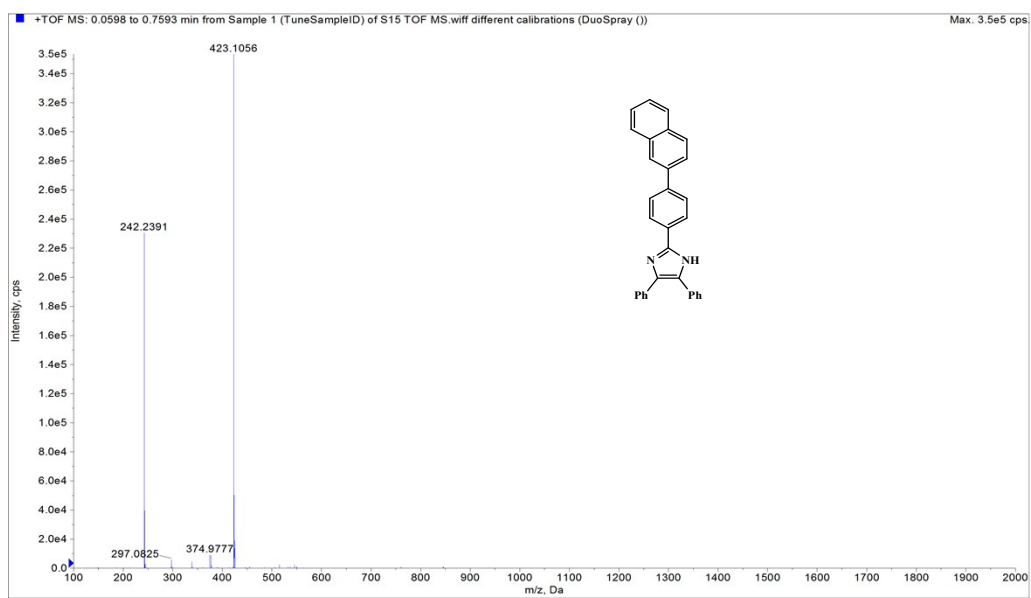

**Figure S6:** ESI-MS spectrum of **3**.

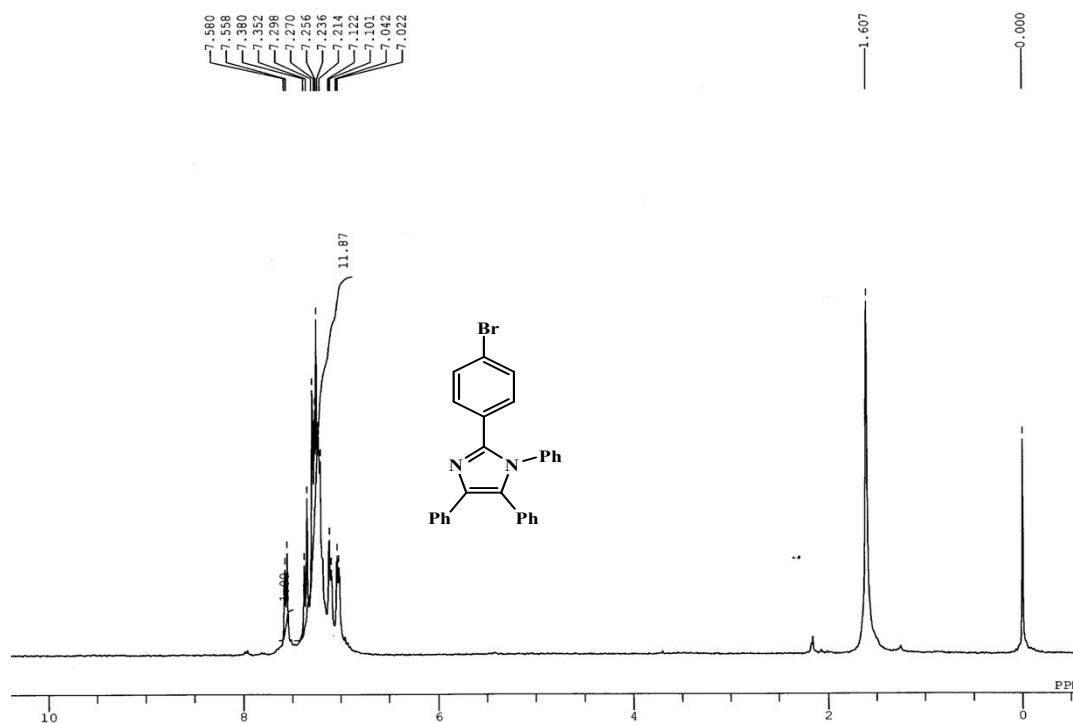

**Figure S7:** <sup>1</sup>H NMR spectrum of **2** in DMSO-*d*<sub>6</sub>.

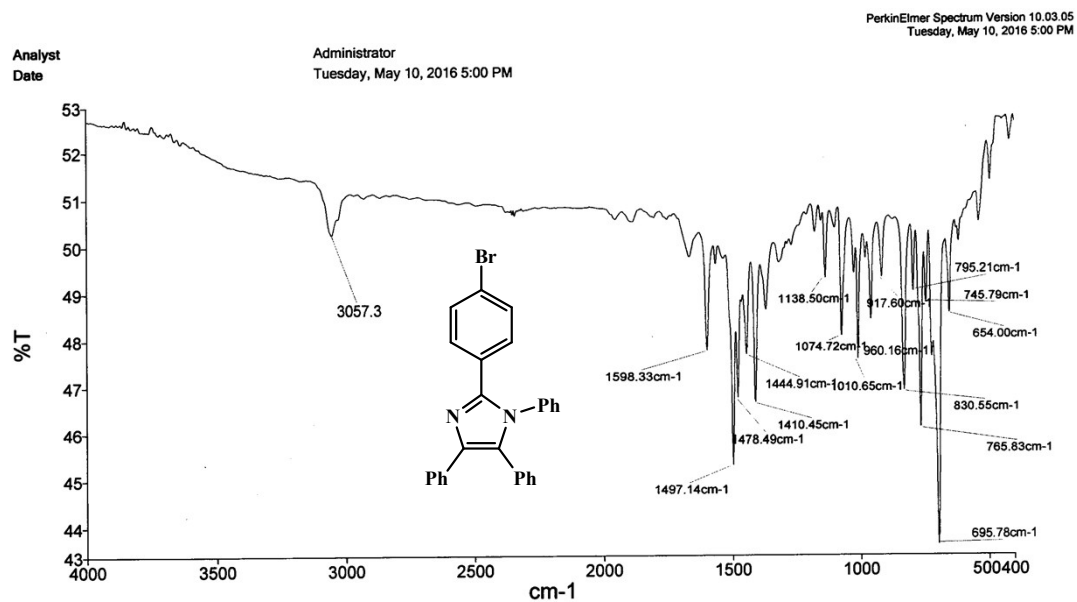

**Figure S8:** FT-IR spectrum of **2**.

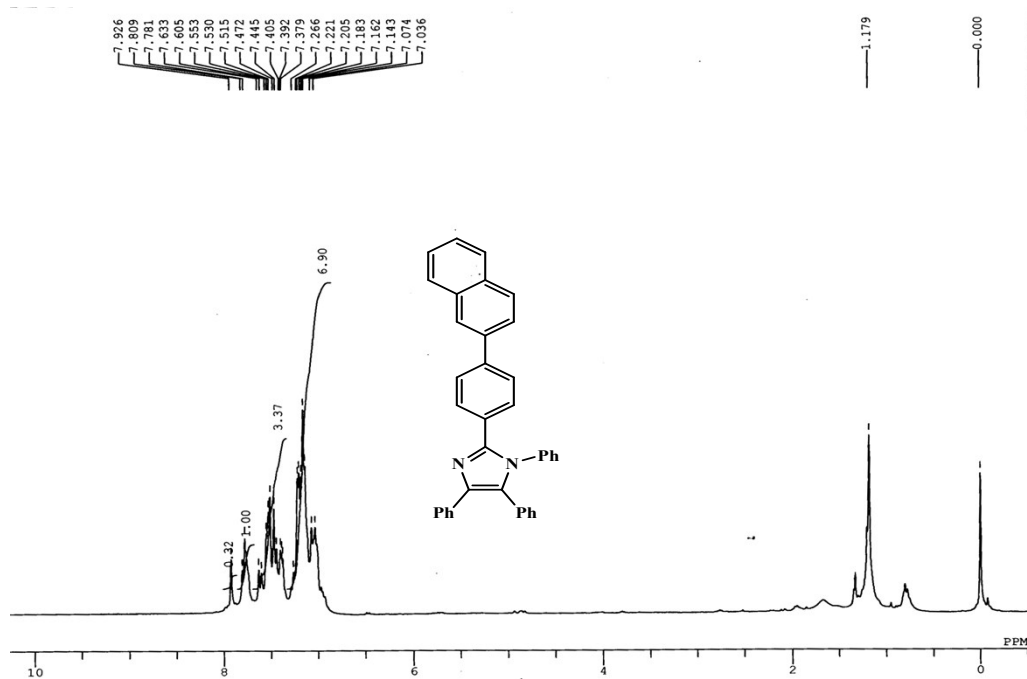

Figure S9: <sup>1</sup>H NMR spectrum of **4** in DMSO-*d*<sub>6</sub>.

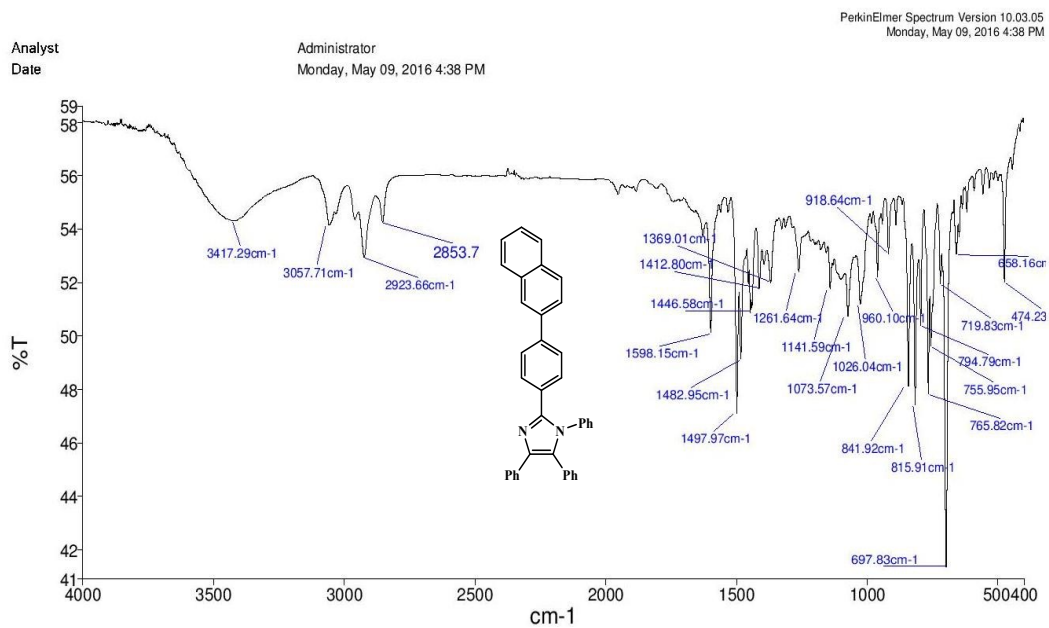

Figure S10: FT-IR spectrum of **4**.

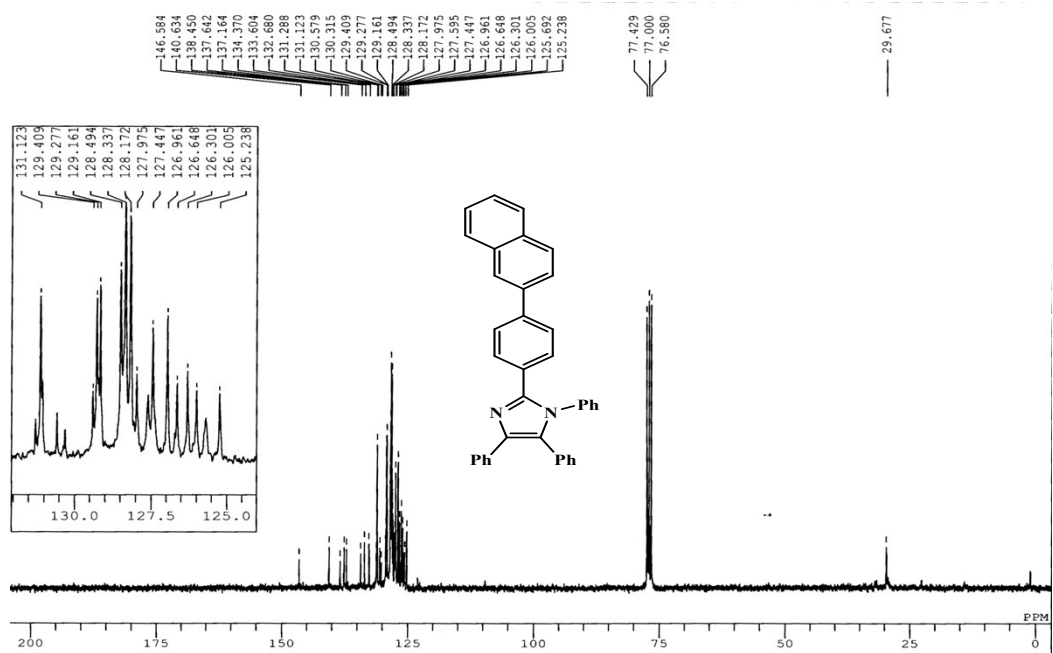

Figure S11: <sup>13</sup>C NMR spectrum of 4 in DMSO-*d*<sub>6</sub>.

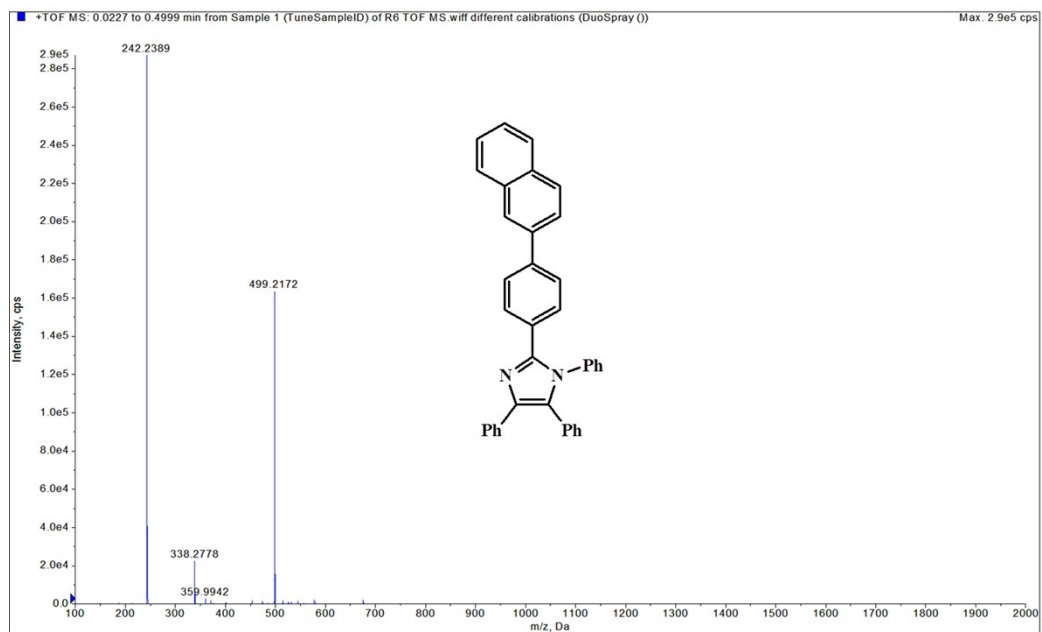

Figure S12: ESI-MS spectrum of 4.

**Table-S13: Photophysical properties of 3**

| S.N | Entry   | $\lambda_{\max}$<br>(nm) | Molar<br>absorptivity<br>$\epsilon = \text{M}^{-1}\text{cm}^{-1}$ | $\lambda_{\text{em}}$<br>(nm) | Stoke's<br>Shift<br>$\Delta\bar{\nu}$ (nm) | Quantum<br>yield<br>$\Phi$ |
|-----|---------|--------------------------|-------------------------------------------------------------------|-------------------------------|--------------------------------------------|----------------------------|
| 1.  | Benzene | 338                      | $2.59 \times 10^4$                                                | 423                           | 85                                         | 0.644                      |
| 2.  | Dioxane | 337                      | $2.50 \times 10^4$                                                | 420                           | 83                                         | 0.650                      |
| 3.  | THF     | 338                      | $2.81 \times 10^4$                                                | 426                           | 88                                         | 0.610                      |
| 4.  | DCM     | 335                      | $3.02 \times 10^4$                                                | 431                           | 96                                         | 0.633                      |
| 5.  | ACN     | 325                      | $3.17 \times 10^4$                                                | 438                           | 113                                        | 0.557                      |
| 6.  | EtOH    | 325                      | $2.72 \times 10^4$                                                | 426                           | 101                                        | 0.604                      |
| 7.  | DMSO    | 340                      | $3.46 \times 10^4$                                                | 448                           | 108                                        | 0.585                      |

**Table-S14: Photophysical properties of 4**

| S.N | Entry   | $\lambda_{\max}$<br>(nm) | Molar<br>absorptivity<br>$\epsilon = \text{M}^{-1}\text{cm}^{-1}$ | $\lambda_{\text{em}}$<br>(nm) | Stoke's<br>Shift<br>$\Delta\bar{\nu}$ (nm) | Quantum<br>yield<br>$\Phi$ |
|-----|---------|--------------------------|-------------------------------------------------------------------|-------------------------------|--------------------------------------------|----------------------------|
| 1.  | Benzene | 323                      | $3.33 \times 10^4$                                                | 408                           | 85                                         | 0.573                      |
| 2.  | Dioxane | 323                      | $3.33 \times 10^4$                                                | 410                           | 87                                         | 0.714                      |
| 3.  | THF     | 324                      | $3.23 \times 10^4$                                                | 413                           | 89                                         | 0.726                      |
| 4.  | DCM     | 322                      | $4.55 \times 10^4$                                                | 420                           | 98                                         | 0.503                      |
| 5.  | ACN     | 321                      | $4.02 \times 10^4$                                                | 426                           | 105                                        | 0.547                      |
| 6.  | EtOH    | 313                      | $3.46 \times 10^4$                                                | 411                           | 98                                         | 0.686                      |
| 7.  | DMSO    | 326                      | $3.16 \times 10^4$                                                | 433                           | 107                                        | 0.768                      |

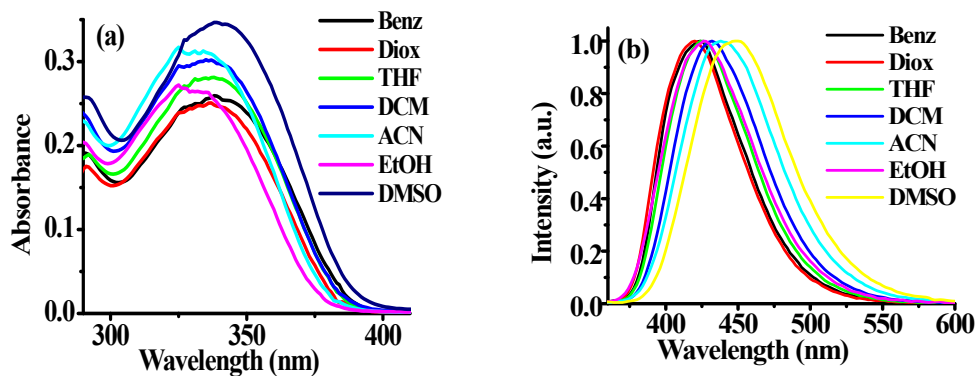**Figure S15:** (a) Absorption and (b) Normalised Emission spectra of probe 3 in different solvents.



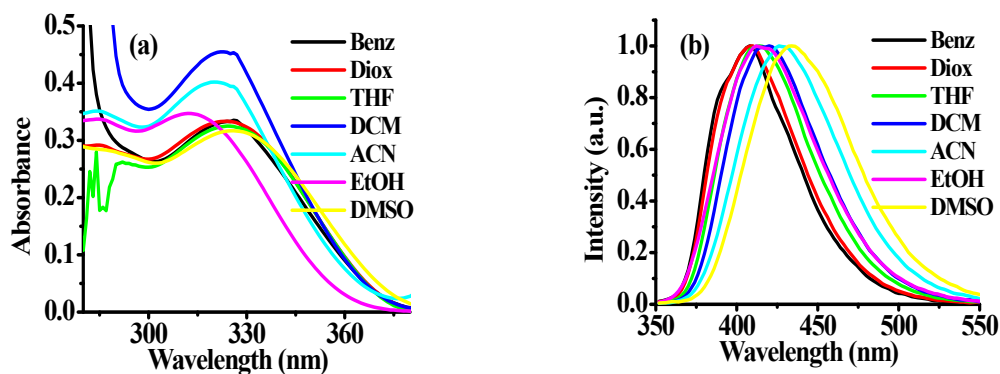

**Figure S16:** (a) Absorption and (b) Normalized Emission spectra of probe **4** in different solvents.

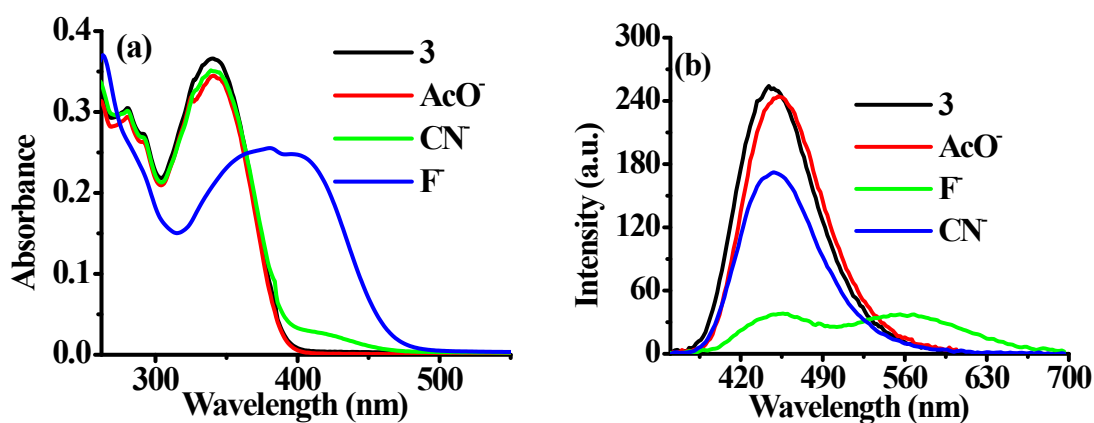

**Figure S17:** (a) Absorption (10  $\mu\text{M}$ ) and (b) emission spectra of **3** (10  $\mu\text{M}$ ) upon interaction with  $\text{CN}^-$ ,  $\text{AcO}^-$  and  $\text{F}^-$  anions (150.0 equiv) in DMSO.

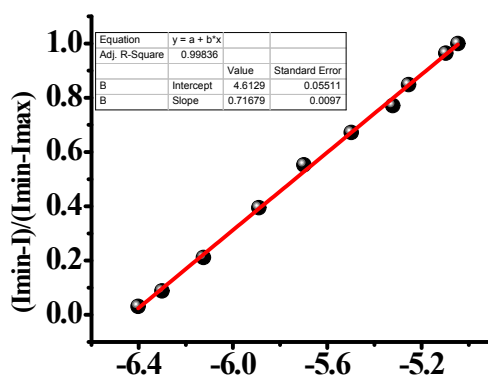

**Figure S18:** Fluorescence intensity change  $\log [\text{CO}_2]$  of  $3+\text{F}^-$  system (10  $\mu\text{M}$ ,  $\lambda_{\text{ex}} = 340$  nm) upon bubbling with different concentration of  $\text{CO}_2$  gas.

**Calculation of limit of detection of CO<sub>2</sub>** : The detection limit of **3+F<sup>-</sup>** system for CO<sub>2</sub> was estimated from plot of normalized fluorescence change of **3+F<sup>-</sup>** system with CO<sub>2</sub> verses Log [CO<sub>2</sub>] using equation (4)<sup>1,2</sup> and found to be 3.67 x 10<sup>-7</sup> M.

$$\mathbf{10}^{-[\text{Slope} / \text{Intercept}]} \dots\dots\dots(4)$$

1. Shortreed, M.; Kopelman, R.; Kuhn, M.; Hoyland, B. *Anal. Chem.* **1996**, 68, 1414-1418.
2. Kim, M. H.; Jang, H. H.; Yi, S.; Chang S.-K.; Han, M. S. *Chem. Commun.* **2009**, 4838-4840.
